# Supplementary material for: Facile microwave-assisted synthesis and controllable architecture of three-dimensional nickel titanate
Source: Royal Society of Chemistry journal article supplement (doi:10.1039/c5ce00154d), 2015-01-01
Supplement: c5ce00154d1.pdf [file c5ce00154d1.pdf]

# Facile microwave-assisted synthesis and controllable architecture of three-dimensional nickel titanate

Thuy-Duong Nguyen-Phan,<sup>a</sup> Chinh Nguyen Huy<sup>a</sup> Chang-Koo Kim<sup>b</sup> and Eun Woo Shin<sup>\*a</sup>

<sup>a</sup> School of Chemical Engineering, University of Ulsan, Daehakro 93, Nam-gu, Ulsan 680-749, South Korea.

<sup>b</sup> Department of Chemical Engineering and Energy Systems Research, Ajou University, 206 Worldcup-ro, Yeongtong-gu, Suwon 443-749, South Korea.

## Corresponding Author

\*Email address: [ewshin@mail.ulsan.ac.kr](mailto:ewshin@mail.ulsan.ac.kr). Fax: +82 52 259 1689; Tel.: +82 52 259 2253

**Electronic Supplementary Information.** Experimental detail of solvolthermal synthesis, methylene blue decolorization and nitrobenzene degradation under visible light illumination. Figures S1-S5 include Tauc's plot for band gap determination, nitrobenzene photodegradation, methylene blue photodecolorization, N<sub>2</sub> sorption isotherm and crystal structure of NiTiO<sub>3</sub>.

## 1. Solvothermal synthesis of nickel titanate

A mixture containing 0.01 mol of Ti(O-C<sub>4</sub>H<sub>9</sub>)<sub>4</sub>, 0.01 mol of Ni(NO<sub>3</sub>)<sub>2</sub>·6H<sub>2</sub>O and 50 mL of C<sub>2</sub>H<sub>6</sub>O<sub>2</sub> (99.9%) was vigorously stirred at room temperature for 8 h. Subsequently, the solution was transferred into a Teflon-lined stainless steel autoclave, and kept for 12 h at 200 °C. A light green precipitate was subsequently collected by centrifugation and washed several times with ethanol. The product was dried at 80 °C overnight and then calcined in air at 600 °C for 4 h. The final yellow nickel titanate was denoted as "NTN-N-EG-s".

## 2. Photodegradation of nitrobenzene

Photocatalytic activity was evaluated through the degradation of nitrobenzene (NB). 50 mg of NTN material was immersed in 100 mL of aqueous NB solution ( $C_o = 10$  ppm). The photoreactor was placed in a dark chamber equipped with a cooling fan under constant stirring. After 90 min of dark adsorption to reach equilibrium, four surrounding 3-W blue LED lamps (CR Lighting Technology Co., Ltd, China) with a lumin flux of 210 Lm and a wavelength range of 450-500 nm were then switched on to illuminate the photoreactor. The concentration of NB upon light exposure was monitored by observing changes in the absorbance at  $\lambda_{max} = 264$  nm as a function of irradiation time using a UV-Vis absorbance microplate spectrophotometer (Spectra Max® Plus 384).

### **3. Photocatalytic decolorization of methylene blue**

The photocatalytic decolorization of methylene blue was determined by using a UV-Vis absorbance microplate spectrophotometer (Spectra Max® Plus 384). 20 mg of catalyst were immersed into 50 mL of an aqueous methylene blue ( $C_o = 2.5 \times 10^{-5}$  M) solution under constant stirring. After 1 hour-reaching the adsorption equilibrium in dark chamber, the solution containing catalyst was irradiated by four 20 W tubular-like compact fluorescent lamps ( $\lambda_{max} = 545$  nm). The changes in dye concentration during photodecolorization were characterized by the absorbance at  $\lambda_{max} = 664$  nm as a function of irradiated time.

### **4. Supporting figures**

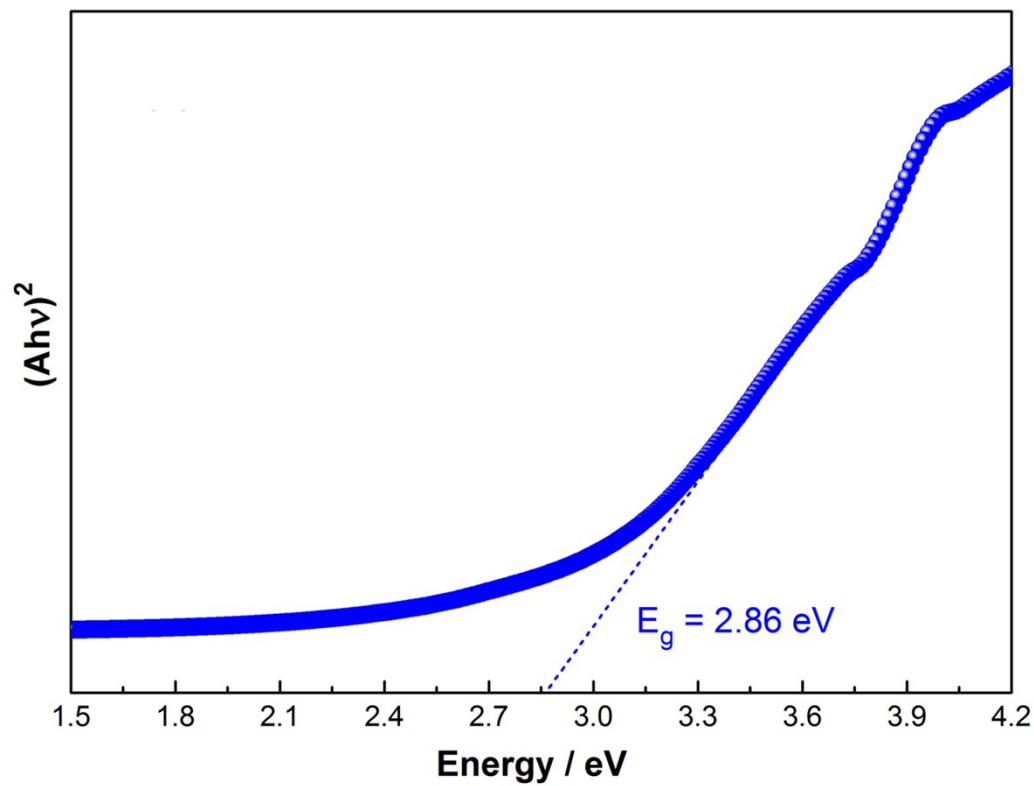

**Figure S1.** Tauc's plot for band gap determination of NTN-N-EG derived from UV-Vis-DRS spectrum.

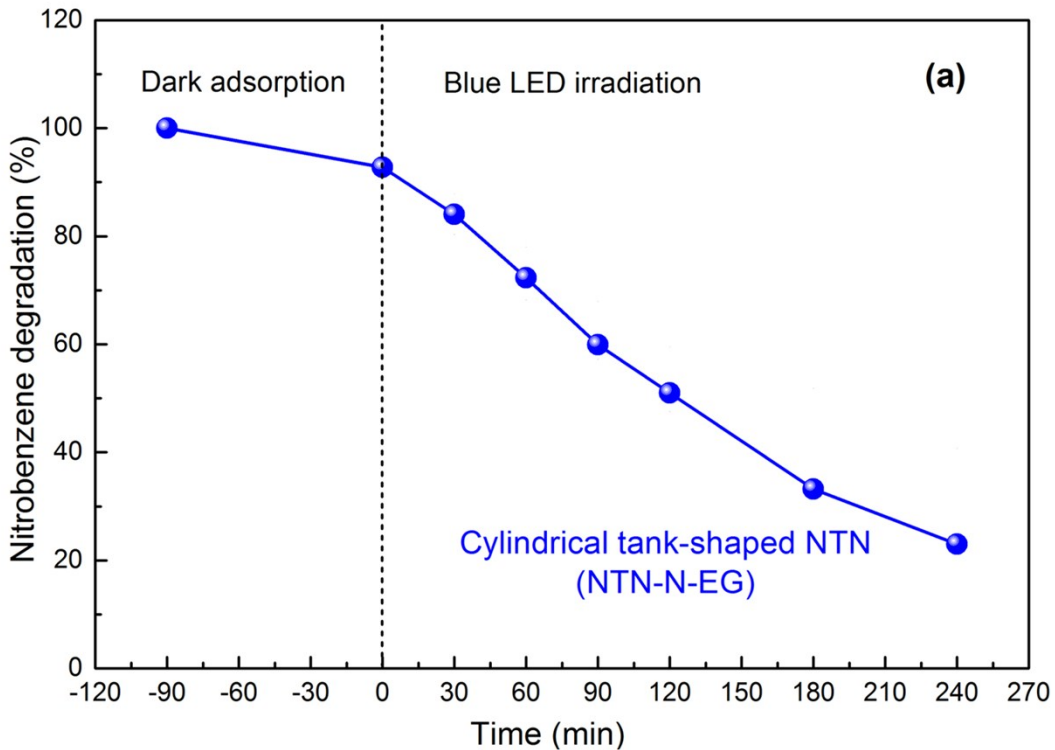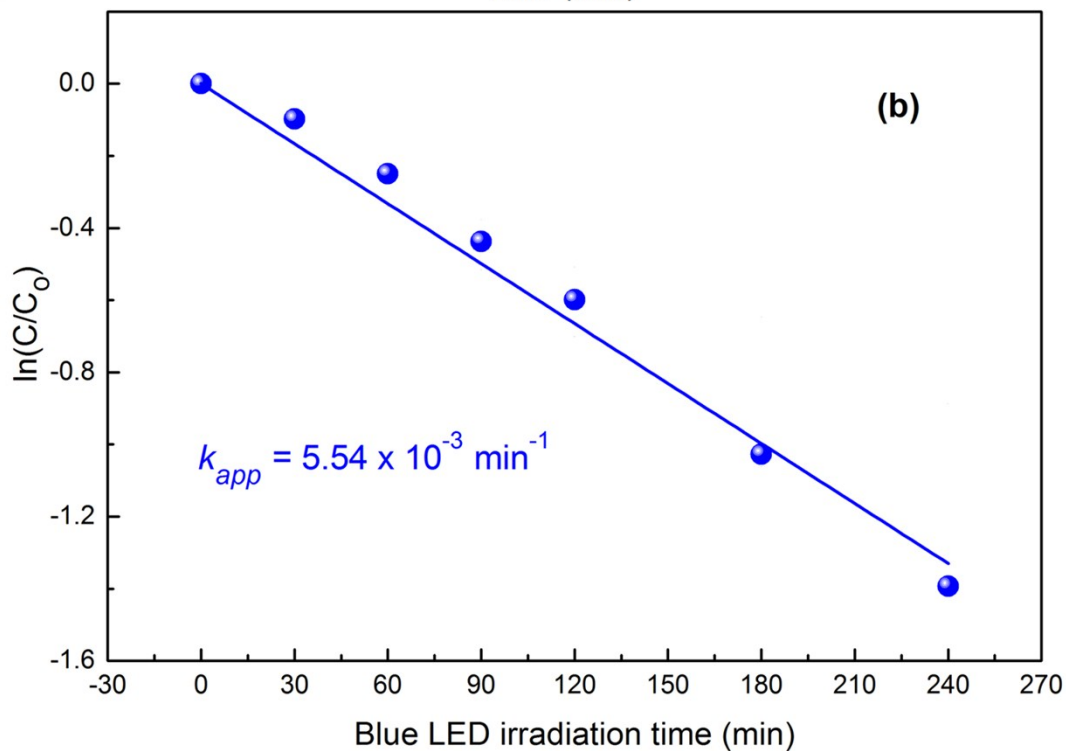

**Figure S2.** (a) Photocatalytic degradation of nitrobenzene and (b) pseudo-first-order kinetics of nitrobenzene photodegradation cylindrical tank-like nickel titanate upon blue LED irradiation.

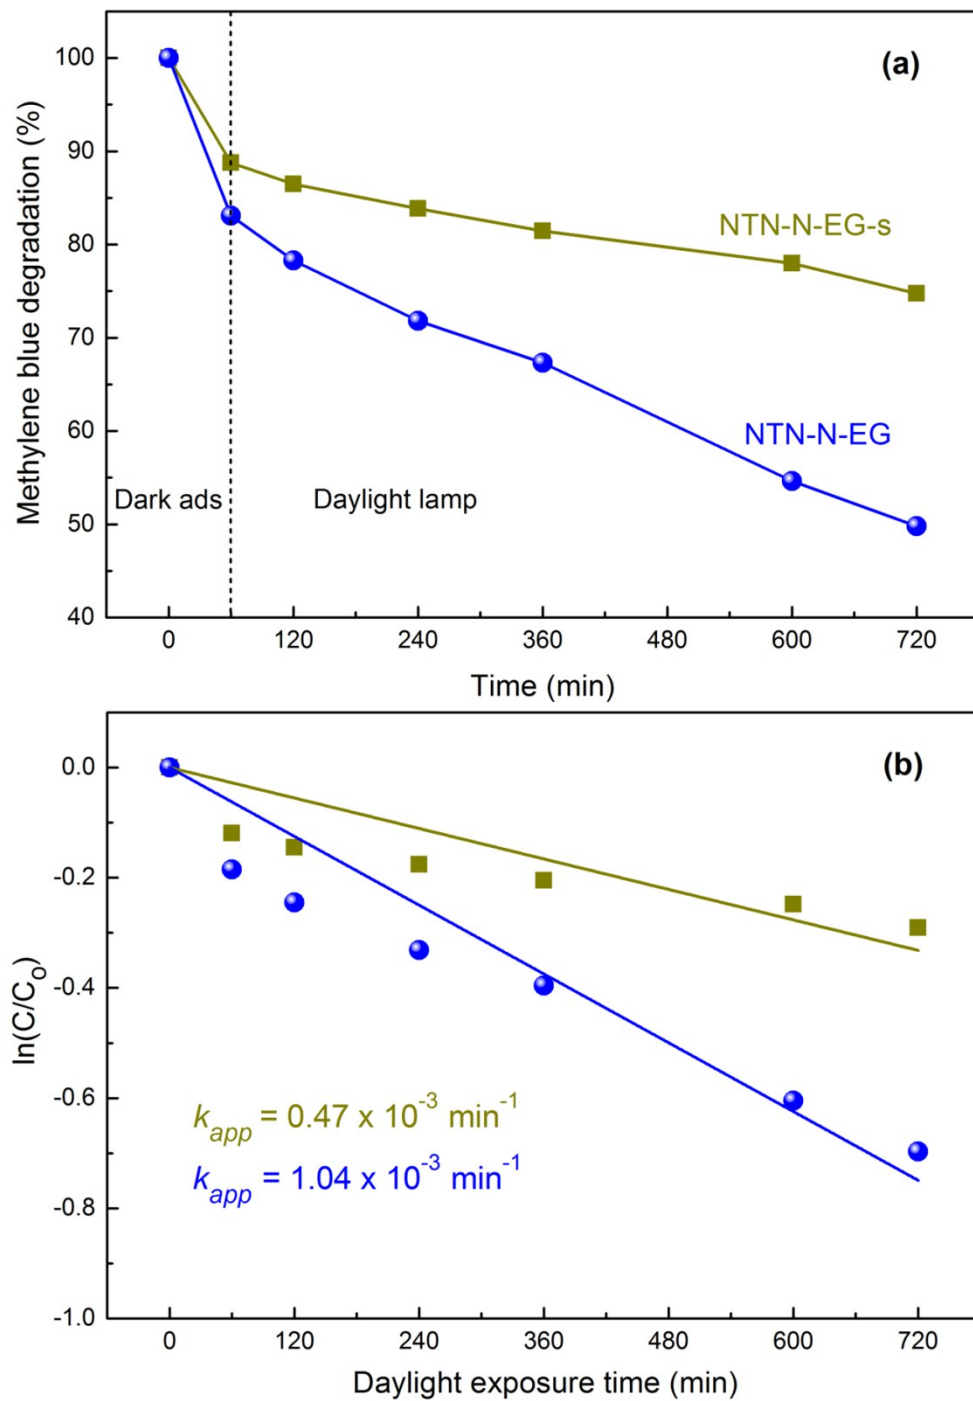

**Figure S3.** (a) Photocatalytic decolorization of methylene blue (10 ppm); (b) pseudo-first-order kinetics over NTN-N-EG prepared by solvothermal and microwave synthesis, respectively, under the illumination of tubular-like compact fluorescent lamp. It can be seen that 3D architecture is beneficial to the photoactivity in comparison with the irregular geometry.

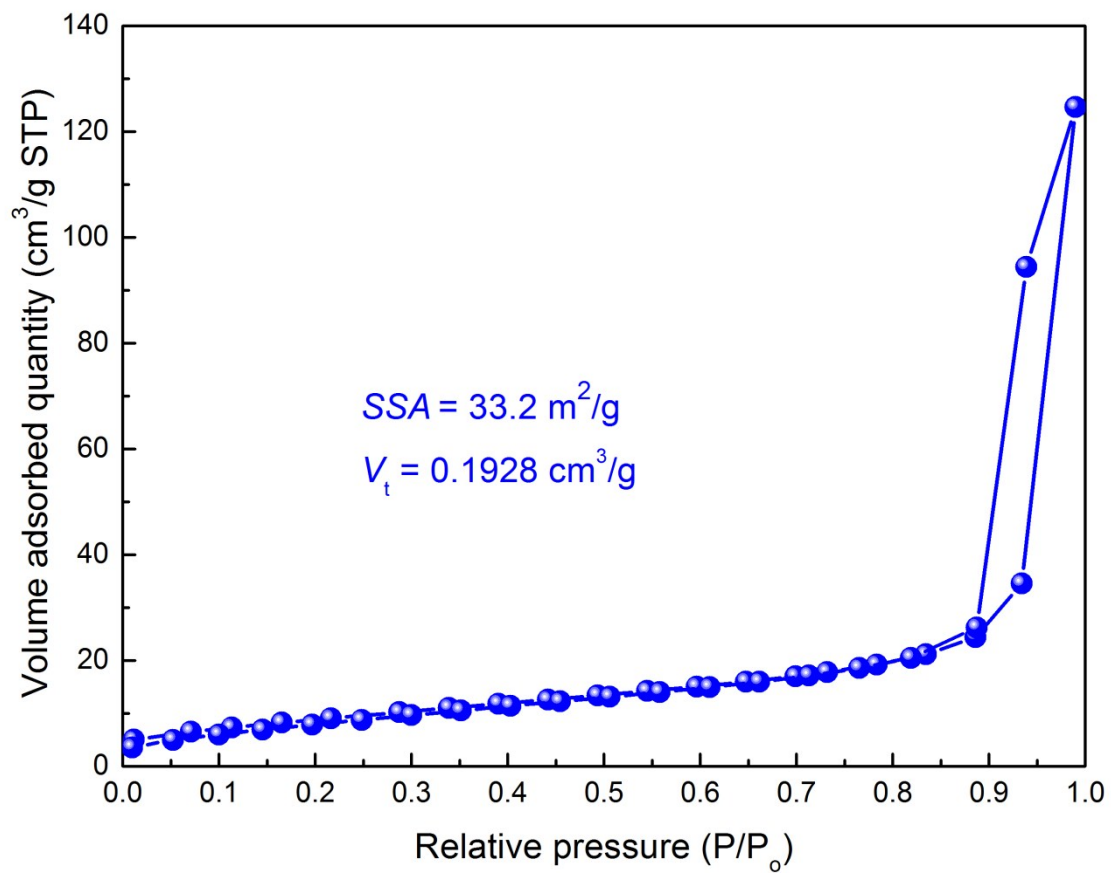

**Figure S4.** N<sub>2</sub> adsorption-desorption isotherms of NTN-EG.

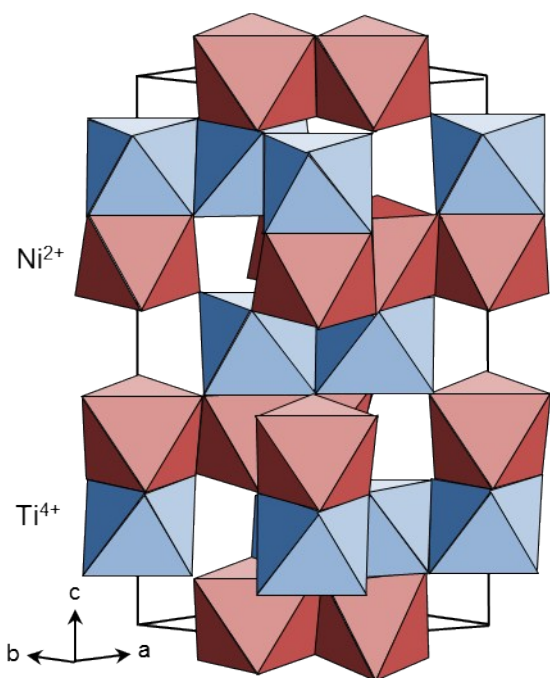

**Figure S5.** Crystal structure of NiTiO<sub>3</sub>.
